# Supplementary material for: Phenotypic and genotypic characterization of Staphylococci causing breast peri-implant infections in oncologic patients
Source: PubMed Central journal article supplement (PMC4328704; doi:10.1186/s12866-015-0368-x), 2015-02-10
Supplement: 12866_2015_368_MOESM1_ESM.pdf [file 12866_2015_368_MOESM1_ESM.pdf]

**Table S1. Genetic and phenotypic characteristics of 13 *S. aureus* strains studied.**

| Strains | MSCRAMM and biofilm genes studied |     |      |     |      |     |     |      |      |      |      |     |      |       | capsular type | Biofilm formation* |             |          | Antibiotype** |     |    |   |    |    |     |    |     |    |     |
|---------|-----------------------------------|-----|------|-----|------|-----|-----|------|------|------|------|-----|------|-------|---------------|--------------------|-------------|----------|---------------|-----|----|---|----|----|-----|----|-----|----|-----|
|         | ebpS                              | eno | AtlA | bap | sasG | ena | bbp | fmbA | fmbB | clfA | clfB | fib | icaA | ica D |               | BHI                | BHI glucose | BHI NaCl | CIP           | SXT | DA | E | TE | RD | LZD | VA | OXA | CN | DPC |
| SA1     | +                                 | +   | +    | -   | +    | +   | -   | +    | -    | +    | -    | -   | +    | +     | 8             | w                  | m           | s        | S             | S   | S  | S | S  | S  | S   | S  | S   | S  | S   |
| SA4     | +                                 | +   | +    | -   | -    | +   | -   | +    | -    | +    | +    | +   | +    | +     | 8             | m                  | s           | w        | S             | S   | S  | R | S  | S  | S   | S  | S   | S  | S   |
| SA7     | +                                 | +   | +    | -   | -    | +   | -   | +    | -    | +    | -    | -   | +    | +     | 8             | m                  | s           | w        | S             | S   | S  | S | S  | S  | S   | S  | S   | S  | S   |
| SA 11   | -                                 | +   | +    | -   | +    | +   | -   | +    | +    | +    | +    | +   | +    | +     | 8             | m                  | s           | w        | S             | S   | S  | S | S  | S  | S   | S  | S   | S  | S   |
| SA18    | +                                 | +   | +    | -   | +    | +   | -   | +    | -    | +    | +    | +   | +    | +     | 5             | m                  | s           | w        | S             | S   | S  | R | S  | S  | S   | S  | S   | S  | S   |
| SA21    | -                                 | +   | +    | -   | +    | +   | -   | +    | +    | +    | +    | +   | +    | +     | 5             | m                  | s           | w        | S             | S   | S  | S | S  | S  | S   | S  | S   | S  | S   |
| SA24    | +                                 | +   | +    | -   | +    | +   | -   | +    | -    | +    | -    | +   | +    | +     | 5             | w                  | m           | s        | S             | S   | S  | S | S  | S  | S   | S  | S   | S  | S   |
| SA 25   | -                                 | +   | +    | -   | +    | +   | -   | +    | -    | +    | +    | +   | +    | +     | 5             | w                  | m           | s        | S             | S   | S  | S | S  | S  | S   | S  | S   | S  | S   |
| SA35    | +                                 | +   | +    | -   | +    | +   | -   | +    | -    | +    | +    | +   | +    | +     | 8             | m                  | s           | w        | S             | S   | S  | R | S  | S  | S   | S  | S   | S  | S   |
| SA 36   | +                                 | +   | +    | -   | +    | +   | -   | +    | -    | +    | -    | +   | +    | +     | 5             | m                  | s           | w        | S             | S   | S  | S | S  | S  | S   | S  | S   | S  | S   |
| SA 38   | +                                 | +   | +    | -   | -    | +   | -   | +    | -    | +    | -    | -   | +    | +     | 8             | m                  | s           | w        | S             | S   | S  | S | S  | S  | S   | S  | S   | S  | S   |
| SA 418  | +                                 | +   | +    | -   | +    | +   | -   | +    | -    | +    | +    | -   | +    | +     | 5             | w                  | m           | s        | S             | S   | S  | S | S  | S  | S   | S  | S   | S  | S   |
| SA 420  | +                                 | +   | +    | -   | +    | +   | -   | +    | -    | +    | +    | +   | +    | +     | 5             | w                  | m           | s        | R             | S   | S  | R | R  | R  | R   | R  | R   | R  | R   |

\* w: weakly adherent, m: moderately adherent; s: strongly adherent

\*\* CIP: ciprofloxacin; SXT: cotrimoxazole; DA: clindamicina; E: erythromycin; TE: tetracycline; RD: rifampicin; LZD: linezolid; VA: vancomycin; OXA: oxacillin; CN: gentamicin; DPC: daptomycin
