# Supplementary material for: Phenotypic and genotypic characterization of Staphylococci causing breast peri-implant infections in oncologic patients
Source: PubMed Central journal article supplement (PMC4328704; doi:10.1186/s12866-015-0368-x), 2015-02-10
Supplement: 12866_2015_368_MOESM2_ESM.pdf [file 12866_2015_368_MOESM2_ESM.pdf]

**Table S2. Genetic and phenotypic characteristics of 7 *S. epidermidis* strains studied.**

| Strains | MSCRAMM and biofilm genes studied |     |     |     |     |      |      |      |      | Biofilm formation* |             |          | Antibiotype** |     |    |   |    |    |     |    |     |    |     |
|---------|-----------------------------------|-----|-----|-----|-----|------|------|------|------|--------------------|-------------|----------|---------------|-----|----|---|----|----|-----|----|-----|----|-----|
|         | Ade                               | aae | aap | bhp | fbc | sdrF | embp | icaA | icaD | BHI                | BHI glucose | BHI NaCl | CIP           | SXT | DA | E | TE | RD | LZD | VA | OXA | CN | DPC |
| SE 5    | +                                 | +   | +   | -   | -   | -    | +    | -    | +    | m                  | s           | w        | S             | S   | S  | R | S  | S  | S   | S  | R   | S  | S   |
| SE 9    | +                                 | +   | +   | -   | +   | +    | +    | -    | -    | m                  | s           | w        | S             | I   | S  | S | S  | S  | S   | S  | S   | S  | S   |
| SE 17   | +                                 | +   | +   | -   | +   | +    | +    | -    | -    | m                  | s           | w        | S             | S   | S  | R | S  | S  | S   | S  | R   | S  | S   |
| SE 20   | +                                 | +   | +   | -   | +   | -    | +    | -    | -    | m                  | s           | w        | S             | S   | S  | S | S  | S  | S   | S  | S   | R  | S   |
| SE 29   | +                                 | +   | +   | -   | +   | -    | +    | +    | +    | w                  | m           | s        | S             | S   | S  | R | S  | S  | S   | S  | S   | S  | S   |
| SE 32   | +                                 | +   | +   | -   | +   | +    | +    | -    | -    | m                  | s           | w        | S             | S   | S  | R | S  | S  | S   | S  | S   | S  | S   |
| SE 40   | +                                 | +   | -   | -   | +   | +    | +    | -    | -    | m                  | s           | w        | S             | S   | S  | S | S  | S  | S   | S  | S   | R  | S   |

\* w: weakly adherent, m: moderately adherent; s: strongly adherent

\*\*CIP: ciprofloxacin; SXT: cotrimoxazole; DA: clindamicina; E: erythromycin; TE: tetracycline; RD: rifampicin; LZD: linezolid; VA: vancomycin; OXA: oxacillin; CN: gentamicin; DPC: daptomycin
