# Supplementary material for: Phenotypic and genotypic characterization of Staphylococci causing breast peri-implant infections in oncologic patients
Source: PubMed Central journal article supplement (PMC4328704; doi:10.1186/s12866-015-0368-x), 2015-02-10

**Figure S1.** Comparison of *icaA* expression in 13 *S. aureus* and 2 *S. epidermidis* grown in BHI medium or in BHI supplemented with 4% NaCl or 1% glucose (Glu).

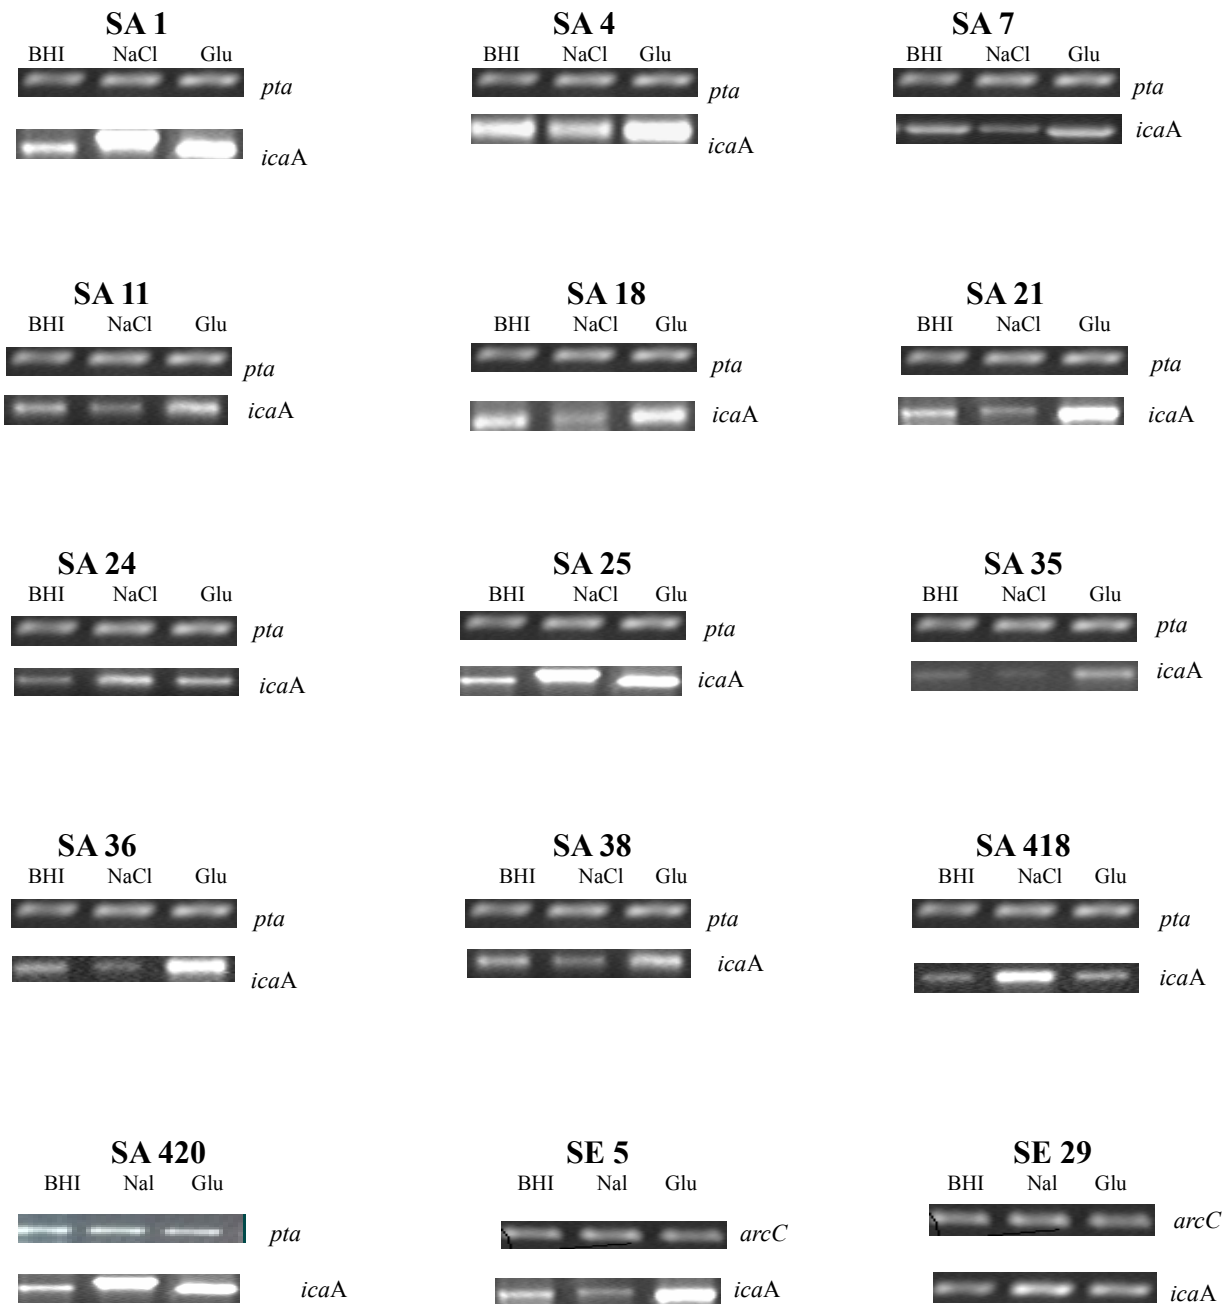

Supplement: 12866_2015_368_MOESM3_ESM.pdf [file 12866_2015_368_MOESM3_ESM.pdf]
