# Supplementary material for: Phenotypic and genotypic characterization of Staphylococci causing breast peri-implant infections in oncologic patients
Source: PubMed Central journal article supplement (PMC4328704; doi:10.1186/s12866-015-0368-x), 2015-02-10
Supplement: 12866_2015_368_MOESM4_ESM.pdf [file 12866_2015_368_MOESM4_ESM.pdf]

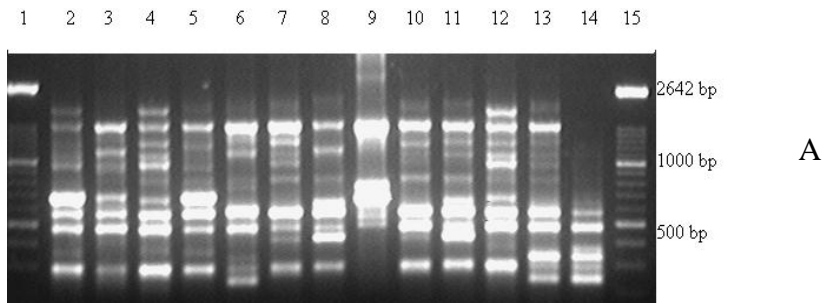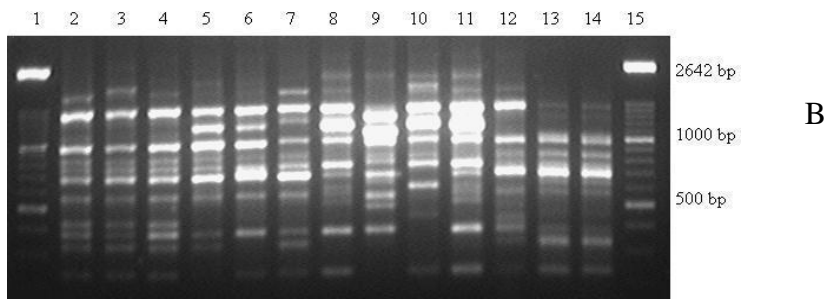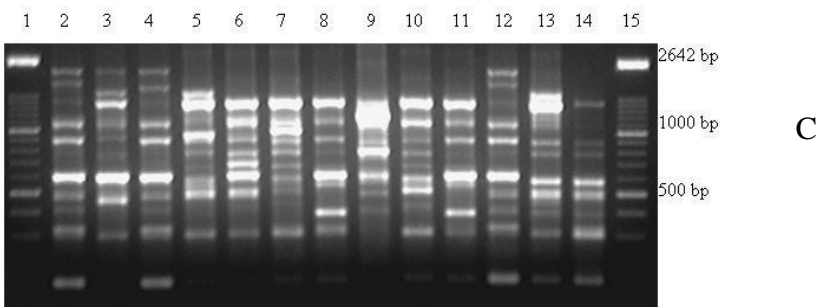

**Figure S2. RAPD fingerprinting of the 13 *S. aureus* strains studied.**
