# Supplementary material for: Phenotypic and genotypic characterization of Staphylococci causing breast peri-implant infections in oncologic patients
Source: PubMed Central journal article supplement (PMC4328704; doi:10.1186/s12866-015-0368-x), 2015-02-10
Supplement: 12866_2015_368_MOESM6_ESM.pdf [file 12866_2015_368_MOESM6_ESM.pdf]

**Table S3.** Primers used for PCR-based detection of staphylococcal factors involved in the pathogenesis of foreign-body associated infections

| Gene             | Putative function of encoded protein                                       | Primer                                                                                                | PCR conditions [Ref.] |
|------------------|----------------------------------------------------------------------------|-------------------------------------------------------------------------------------------------------|-----------------------|
| <i>S. aureus</i> |                                                                            |                                                                                                       |                       |
| <i>fnbA</i>      | Fibronectin adhesin                                                        | Forward 5'-CAT AAA TTG GGA GCA GCA TCA-3'<br>Reverse 5'-ATC AGC AGC TGA ATT CCC ATT-3'                | [42]                  |
| <i>fnbB</i>      | Fibronectin adhesin                                                        | Forward 5'-GTA ACA GCT AAT GGT CGA ATT GAT ACT-3'<br>Reverse 5'-CAA GTT CGA TAG GAG TAC TAT GTT C-3'  | [40]                  |
| <i>clfA</i>      | Fibrinogen adhesin                                                         | Forward 5'-ATT GGC GTG GCT TCA GTG CT-3'<br>Reverse 5'-GTT TCT TCT GTA GTT GCA TTT G-3'               | [40]                  |
| <i>clfB</i>      | Fibrinogen adhesin                                                         | Forward 5'-TCG GTT GGA ATA ATG AGA ATG T-3'<br>Reverse 5'-TTT CGC TCT TAT CTC CTG TTT C-3'            | [43]                  |
| <i>cna</i>       | Collagen adhesion                                                          | Forward 5'-AAA GCG TTG CCT AGT GGA GA-3'<br>Reverse 5'-AGT GCC TTC CCA AAC CTT TT-3'                  | [41]                  |
| <i>ebpS</i>      | Elastin adhesion                                                           | Forward 5'-CAT CCA GAA CCA ATC GAA GAC-3'<br>Reverse 5'-AGT TAC ATC ATC ATG TTT ATC TTT TG-3'         | [40]                  |
| <i>sasG</i>      | Adherence to desquamated nasal epithelial cells                            | Forward 5'-CGA GCT TTT CTA ACC TTA GGT GTC-3'<br>Reverse 5'-ACC ACA GGG TGT AGA AGC TAA ATC-3'        | [37]                  |
| <i>icaA</i>      | N-acetyl-D-glucosamine synthase involved in PIA synthesis                  | Forward 5'-CGC ACT CAA TCA AGG CAT TA-3'<br>Reverse 5'-CCA GCA AGT GTC TGA CTT CG-3'                  | [29]                  |
| <i>icaD</i>      | Intercellular adhesion proteinD                                            | Forward 5'-ATG GTC AAG CCC AGA CAG AG<br>Reverse 5'-TTG CTT TAA ACA TTG AAA ATA CT-3'                 | [31]                  |
| <i>bap</i>       | Involved in biofilm formation in <i>S. aureus</i> bovine mastitis isolates | Forward 5'-CCC TAT ATC GAA GGT GTA GAA TTG CAC-3'<br>Reverse 5'-GCT GTT GAA GTT AAT ACT GTA CCT GC-3' | [36]                  |
| <i>eno</i>       | Binds laminin                                                              | Forward 5'-ACG TGC AGC AGC TGA CT-3'<br>Reverse 5'-CAA CAG CAT CTT CAG TAC CTT C-3'                   | [40]                  |

|                           |                                |                                                                                                              |      |
|---------------------------|--------------------------------|--------------------------------------------------------------------------------------------------------------|------|
| <i>atlA</i>               | Autolysin                      | Forward 5'-CCG TTA CCT GTT TCT AAT AGG-3'<br>Reverse 5'-CAG TTA GCA AGA TTG CTC AAG-3'                       | [32] |
| <i>bbp</i>                | Binds bone sialoprotein        | Forward 5'-AAC TAC ATC TAG TAC TCA ACA ACA G-3'<br>Reverse 5'-ATG TGC TTG AAT AAC ACC ATC ATC T-3'           | [40] |
| <i>fib</i>                | Binds fibrinogen               | Forward 5'-CTA CAA CTA CAA TTG CGT CAA CAG-3'<br>Reverse 5'-GCT CTT GTA AGA CCA TTT TCT TCA C-3'             | [40] |
| <i>lukM</i>               | Toxin                          | Forward 5'-TGG ATG TTA CCT ATG CAA CCT AC-3'<br>Reverse 5'-GTT CGT TTC CAT ATA ATG AAT CAC TAC -3'           | [48] |
| <i>lukDE</i>              | Toxin                          | Forward 5'-TGA AAA AGG TTC AAA GTT GAT ACG AG-3'<br>Reverse 5'-TGT ATT CGA TAG CAA AAG CAG TGC A-3'          | [48] |
| <i>lukS/F-PV</i>          | Panton Valentine leukocidin    | Forward 5'-ATC ATT AGG TAA AAT GTC TGG ACA TGA TCC A-3'<br>Reverse 5'-GCA TCA AGT GTA TTG GAT AGC AAA AGC-3' | [47] |
| <i>cps5</i>               | capsular polysaccharide type 5 | Forward 5'-GGTTTGCTGAAAAACCAGTC-3'<br>Reverse 5'-CCTCATATGCTCCTACATTT-3'                                     | [46] |
| <i>cps8</i>               | capsular polysaccharide type 8 | Forward 5'-GCGCTACAAACATTAAGCAT-3'<br>Reverse 5'-TTCTTAGCCTGCTGGCATC-3'                                      | [46] |
| <i>agr<sub>Sa</sub></i>   | gene regulator                 | 5'-ATGCACATGGTGCACATGC-3'                                                                                    | [50] |
| <i>agr-1<sub>Sa</sub></i> | gene regulator                 | 5'-GTCACAAGTACTATAAGCTGCGAT-3'                                                                               | [50] |
| <i>agr-2<sub>Sa</sub></i> | gene regulator                 | 5'-TATTACTAATTTGAAAAGTGCCATAGC-3'                                                                            | [50] |
| <i>agr-3<sub>Sa</sub></i> | gene regulator                 | 5'-GTAATGTAATAGCTTGTATAATAATACCCAG-3'                                                                        | [50] |
| <i>agr-4<sub>Sa</sub></i> | gene regulator                 | 5'CGATAATGCCGTAATACCCG-3'                                                                                    | [50] |
| <i>S. epidermidis</i>     |                                |                                                                                                              |      |
| <i>fbe</i>                | Fibrinogen adhesin             | Forward 5'-TAA ACA CCG ACG ATA ATA ACC AAA-3'<br>Reverse 5'-GGT CTA GCC TTA TTT TCA TAT TCA-3'               | [42] |
| <i>embp</i>               | Fibronectin adhesin            | Forward 5'-AGC GGT ACA AAT GTC AAT ATC-3'<br>Reverse 5'-AGA AGT GCT CTA GCA TCA TCC-3'                       | [45] |

|             |                                                                    |                                                   |                                                                 |
|-------------|--------------------------------------------------------------------|---------------------------------------------------|-----------------------------------------------------------------|
| <i>atlE</i> | Promotes binding to polystyrol;<br>vitronectin adhesin             | Forward 5'-CAA CTG CTC AAC CGA GAA CA-3'          | [34]                                                            |
|             |                                                                    | Reverse 5'-CAT CGT TTT CAG CGC TAT CA-3'          |                                                                 |
| <i>aae</i>  | Autolysin                                                          | Forward 5'-AAC AAA TTG ATA AAG CAA CG-3'          | [35]                                                            |
|             |                                                                    | Reverse 5'-GTT GTC TTT CCT TTA GTG TC-3'          |                                                                 |
| <i>aap</i>  | Intercellular adhesin                                              | Forward 5'-TCA CTA AAC AAC CTG TTG ACG AA-3'      | [39]                                                            |
|             |                                                                    | Reverse 5'-AAT TGA TTT TTA TTA TCT GTT GAA TGC-3' |                                                                 |
| <i>icaA</i> | N-acetyl-D-glucosamine synthase<br>involved in PIA synthesis       | Forward 5'-GAC CTC GAA GTC AAT AGA GGT-3'         | [26]                                                            |
|             |                                                                    | Reverse 5'-CCC AGT ATA ACG TTG GAT ACC-3'         |                                                                 |
| <i>icaD</i> | Intercellular adhesion proteinD                                    | Forward 5'-ATG GTC AAG CCC AGA CAG AG-3'          | [32]                                                            |
|             |                                                                    | Reverse 5'-CGT GTT TTC AAC ATT TAA TGC AA-3'      |                                                                 |
| <i>bhp</i>  | Homologue to biofilm associated<br>protein Bap of <i>S. aureus</i> | Forward 5'-TGG TAT TAG GAA GCT CTC AG-3'          | [38]                                                            |
|             |                                                                    | Reverse 5'-ATA CCA GCG TGA CGC AAA TC-3'          |                                                                 |
| <i>sdrF</i> | Collagen adhesion                                                  | Forward 5'-AGC GGC TGA AGA CAA TCA AT-3'          | 30 sec 95°C, (15 sec 95°C,<br>15 sec 55°C, 15 sec 60°C) x<br>30 |
|             |                                                                    | Reverse 5'-TCA CTT GTC GTT GGT GCT TC-3'          |                                                                 |
